# Supplementary material
Source: PubMed Central journal article supplement (PMC10529701)
Supplement: NIHMS1909893-supplement-2.pdf [file NIHMS1909893-supplement-2.pdf]

## Supplemental Information

### Figure Legends

**Supplemental Figure S1. PDK4, inhibited by canonical TGF $\beta$ /RSMADs signaling, plays crucial roles in regulating PDH phosphorylation. Related to Figure 2.** **A**, Representative blots for PDK proteins and PDH phosphatase 1 in HUAECs treated with 7 days of TGF $\beta$ 2 stimulation (10ng/ml). **B**, Representative blots for PDK proteins in HUAECs transduced with Scramble siRNA or PDK4 siRNAs for blocking PDK4. **C-D**, EndMT markers, EC markers, and PDH phosphorylation were analyzed in HUAECs transduced with siRNAs for blocking PDK1 or PDK2 separately (**C**), or for blocking PDK3 or PDK4 separately (**D**). **E-F**, The roles of canonical ALK5/RSMADs in inhibiting PDK4 expression. Constitutively active ALK5 mutant (ALK5-CA) was adenoviral delivered in HUAECs, and level of phospho-SMAD2, SM22 $\alpha$  and PDK4 was showed (**E**). A reduction of PDK4 level induced by TGF $\beta$ 2 stimulation, and the protein level of PDK4 was restored by blocking SMAD4 in HUAECs (**F**).

**Supplemental Figure S2. Blocking ACSS2, but not ACLY, reverses the effects induced by TGF $\beta$  signaling in endothelial cells. Related to Figure 2.** **A-B**, Representative blots showing EndMT markers and EC-specific gene expression in Human Aortic Endothelial cells(HAECs) treated with Scramble siRNA, Scramble siRNA + TGF $\beta$ 2, or *ACSS2* siRNA + TGF $\beta$ 2 (**A**) / *ACLY* siRNA + TGF $\beta$ 2 (**B**) separately for 7 days. **C**, EndMT markers and EC-specific gene expression were determined in HUAECs treated with different conditions: Adv-CTL, Adv-CTL + TGF $\beta$ 2, or Adv-*ACSS2*-HA + TGF $\beta$ 2 separately for 3 days. **D**, Bulk RNA-seq analysis of metabolic-related genes expression in HUAECs with different conditions: Scramble siRNA, Scramble siRNA + TGF $\beta$ 2, or *ACSS2* siRNA + TGF $\beta$ 2. **E**, mRNA level of *ACSS2* and *PDK* genes in HUAECs under different conditions: Scramble siRNA, Scramble siRNA + TGF $\beta$ 2, or *ACSS2* siRNA + TGF $\beta$ 2. **F**, CHIP-QPCR testing of Smad-2/3 binding to SBEs on human *PDK4* promoter in HUAECs treated with different conditions: Scramble siRNA, Scramble siRNA + TGF $\beta$ 2, or *ACSS2* siRNA + TGF $\beta$ 2. The data in **F** were normalized to those of the non-TGF $\beta$ 2 treated control or scramble siRNA-treated control and are presented as the mean  $\pm$  SEM from three independent experiments. \*\*\*\* $P \leq 0.0001$ . **G**, Representative blots showing the changes of TGF $\beta$ -regulated EndMT markers, PDK4 and SMAD2 phosphorylation following overexpression of PDK4 in HUAECs. **H**, Representative blots showing the changes of ALK1 and ALK5 in HUAECs treated with different conditions: Scramble siRNA, Scramble siRNA + TGF $\beta$ 2, or *ACSS2* siRNA + TGF $\beta$ 2.

**Supplemental Figure S3. A blockade of proliferation is induced by blocking PDK4 and sodium acetate treatment. Related to Figure 2 and Figure 3.** **A**, EdU positive cells were analyzed in HUAECs transduced with Scramble siRNA or *PDK4* siRNA for 7 days. **B**, EdU staining showing the proliferation of HUAECs treated with different concentration of sodium acetate. **C**, The pH of the EGM-2 medium containing different concentration of sodium acetate was measured using a pH meter (pHTestr 50S, OAKTON). **D-F**, Images showing the cell morphology (**D**), the staining of mesenchymal markers (**E**), or cell proliferation (**F**) of HUAECs treated with Scramble siRNA, *PDK4* siRNA, or *ACSS2* siRNA + *PDK4* siRNA. Single pair-wise comparison between two groups performed by unpaired, two-tailed Student's t-test using Prism 9. \* $P$  values < 0.05. \*\*\* $P$  values < 0.001. \*\*\*\* $P$  values < 0.0001.

**Supplemental Figure S4. Acetate-generated Ac-CoA mediated by ACSS2 plays positive roles in the maintenance of endothelial TGF $\beta$ -ALK5-RSMADs signaling. Related to**

**Figure 4 and Figure 5. A-B**, Representative blots showing phosphorylated R-SMADs in HUAECs(A) and HAECs(B) transduced with Scramble siRNA, *ACLY* siRNA, or *ACSS2* siRNA separately in the presence of TGFβ2 stimulation for 7 days. **C**, Blots of the total SMAD7 and acetylated SAMD7 in HUAECs treated with TGFβ2 stimulation for 7 days. **D-E**, Blots showing acetylated R-SMADs in HUAECs transduced with Scramble siRNA or *ACSS2* siRNA separately in the presence of TGFβ2 stimulation for 7 days (**D**), or acetylated R-SMADs in HUAECs overexpressing *ACSS2*-HA in the presence of TGFβ2 stimulation for 3 days (**E**). **F**, Representative blots of cytosolic and nucleic RSMADs in HUAECs overexpressing *ACSS2*-HA for 3 days. **G-H**, mRNA(**G**) and protein(**H**) level of ALK5 in HUAECs transduced with Scramble siRNA or *PDK4* siRNA for 7 days. **I-J**, Blots showing phosphorylated R-SMADs in HUAECs with *PDK4* knockdown(**I**) or pharmacological inhibition of PDKs with DCA (**J**) for 7 days. **K**, Half-life of ALK5-V5 in HUVECs transduced with Scramble siRNA or *ACSS2* siRNA separately. ALK5-V5 was adenovirally overexpressed in HUVECs followed by cycloheximide (CHX, 10 μg/ml) treatment at the indicated time points. ALK5-V5 protein level was determined by anti-V5 antibody. **L-M**, Representative blots showing the regulation of ALK5 degradation in HUVECs. HUVECs were firstly transduced with Scramble siRNA or *ACSS2* siRNA, then ALK5-V5 was adenovirally overexpressed in HUAECs followed the treatment with a proteasome inhibitor MG132 (**L**) or lysosome inhibitor chloroquine (**M**).

**Supplemental Figure S5. Characterization of acetylated sites for Human ALK5. Related to Figure 5. A**, Representative blots of exogenous acetylated ALK5 in 293T cells transfected with Vector or ALK5-Flag plasmids, ALK5(Flag) was immunoprecipitated followed by immunoblotting to detect Acetylated-Lysine (Ac-Lysine) and ALK5 (Flag). **B**, LC-MS/MS analysis of the digested ALK5-Flag proteins immunoprecipitated by anti-Flag beads, and Lysine 490 is the acetylated site of ALK5 by analyzing the peptides of mass spectrum. **C**, Lysine residue locates at the protein kinase domain of ALK5. **D**, 293T cells were transfected with ALK5-WT or K490R mutant bearing single lysine (K) to arginine (R) substitutions at Lysine 490 site, and ALK5-WT or K490R mutant were immunoprecipitated with anti-Flag beads. Acetylated-ALK5 protein level was determined by anti-Ac-Lysine antibody. **E**, Single K-R mutation strategy in characterizing acetylation sites for Human ALK5. There are 25 Lysine residues in Human ALK5, and 25 mutants bearing single K-R mutation were constructed. After IP-anti-FLAG / IB-anti-Ac-Lysine screening analysis, representative blots showing the major lysine residues (K223, K343, K391, K449, and K490 (by LC-MS/MS)) for acetylation.

**Supplemental Figure S6. The generation of *Cdh5-CreER<sup>T2</sup>*; *Acss2<sup>fl/fl</sup>*; *ApoE<sup>-/-</sup>* mice and *Acss2<sup>fl/fl</sup>*; *ApoE<sup>-/-</sup>* mice. Related to Figure 7. A**, diagram showing the genomic information of *Acss2* gene in *Acss2<sup>fl/fl</sup>* mice. **B**, diagram showing the generation of *Acss2<sup>fl/fl</sup>*; *ApoE<sup>-/-</sup>* mice and *Cdh5-CreER<sup>T2</sup>*; *Acss2<sup>fl/fl</sup>*; *ApoE<sup>-/-</sup>* mice. **C-D**, Deletion efficiency of *Acss2* gene in the lung endothelial cells of *Cdh5-CreER<sup>T2</sup>*; *Acss2<sup>fl/fl</sup>*; *ApoE<sup>-/-</sup>* mice. **E**, Plaques in aortas of control *ApoE<sup>-/-</sup>* female mice (♀) and *Acss2<sup>iECKO</sup>; ApoE<sup>-/-</sup>* female mice (♀) were stained with Oil-Red-O. **F**, Oil-Red-O analysis of whole aortas, aortic arch, thoracic aorta, and abdominal aorta from control *ApoE<sup>-/-</sup>* female mice (♀) (n=10) and *Acss2<sup>iECKO</sup>; ApoE<sup>-/-</sup>* female mice (♀) (n=14). **G-H**, total cholesterol level (**G**) and triglycerides (**H**) in plasma collected from control *ApoE<sup>-/-</sup>* female mice (♀) and *Acss2<sup>iECKO</sup>; ApoE<sup>-/-</sup>* female mice (♀) after 3 months of high fat diet. NS, no significance. The plaque lesion area and total surface area of aortas were quantified using ImageJ software. A single pair-wise comparison between two groups performed by unpaired, two-tailed Student's t-test using Prism 9. NS, no significance, \**P* values < 0.05, \*\**P* values < 0.01.

**Supplemental Figure S7. Reduced development of atherosclerosis following endothelial**

**ACSS2 knockdown in ApoE<sup>-/-</sup> mice. Related to Figure 7.** **A**, A knockdown efficiency of ACSS2 siRNA in mice artery endothelial cells (MAEC). MAECs were incubated with 20nM unmodified ACSS2 siRNAs in EGM-2/Opti-MEM medium for 10 hrs. Three days after siRNA delivery, Acss2 level in total cell lysates was analyzed by immunoblotting with anti-ACSS2 antibody. **B**, Flow diagram showing timing of atherosclerosis induction and 7C1 LNP delivery in ApoE<sup>-/-</sup> mice. **C-D**, Plaques in aortas of ApoE<sup>-/-</sup> mice were stained with Oil-Red-O. Images showing the Oil-Red-O staining of aortas dissected from 12 control ApoE<sup>-/-</sup> mice and 9 unmodified (siRNA 1) and 9 modified (siRNA 2) ACSS2 siRNA-treated ApoE<sup>-/-</sup> mice (**C**). Oil-Red-O analysis of whole aortas from control and ACSS2 siRNA-treated ApoE<sup>-/-</sup> mice. The plaque lesion area and total surface area of aortas were quantified using ImageJ software. A single pair-wise comparison between two groups performed by unpaired, two-tailed Student's t-test using Prism 9. \*\*\**P* values < 0.001 (**D**).

**Supplemental Figure S8. ACSS2 and inhibition of PDK4 drive a positive feedback loop.** **A**, Representative blots showing the phosphorylation of PDHE1 $\alpha$  decreased by PDK4 knockdown can be restored by ACSS2 deficiency in HUAECs. **B-C**, Representative blots showing ACSS2 knockdown reduced EndMT markers and restored EC-specific gene expression induced by PDK4 siRNA in HUAECs(**B**) and HAECs(**C**). **D-E**, In the context of pro-EndMT TGF $\beta$  signaling, the elevated phosphorylation of PDHE1 $\alpha$  by ACSS2 knockdown was reversed by knocking down PDK4 in HUAECs(**D**) and HAECs(**E**). **F-G**, In the presence of TGF $\beta$  signaling, the reduced EndMT markers and restored EC-specific gene expression by ACSS2 knockdown can be reversed by blocking PDK4 in HUAECs(**F**) and HAECs(**G**).

**Supplemental Table 1. Information of siRNA and qPCR primers. Related to STAR Methods**

**Supplemental Table 2. Information of donors. Related to Figure 6.**

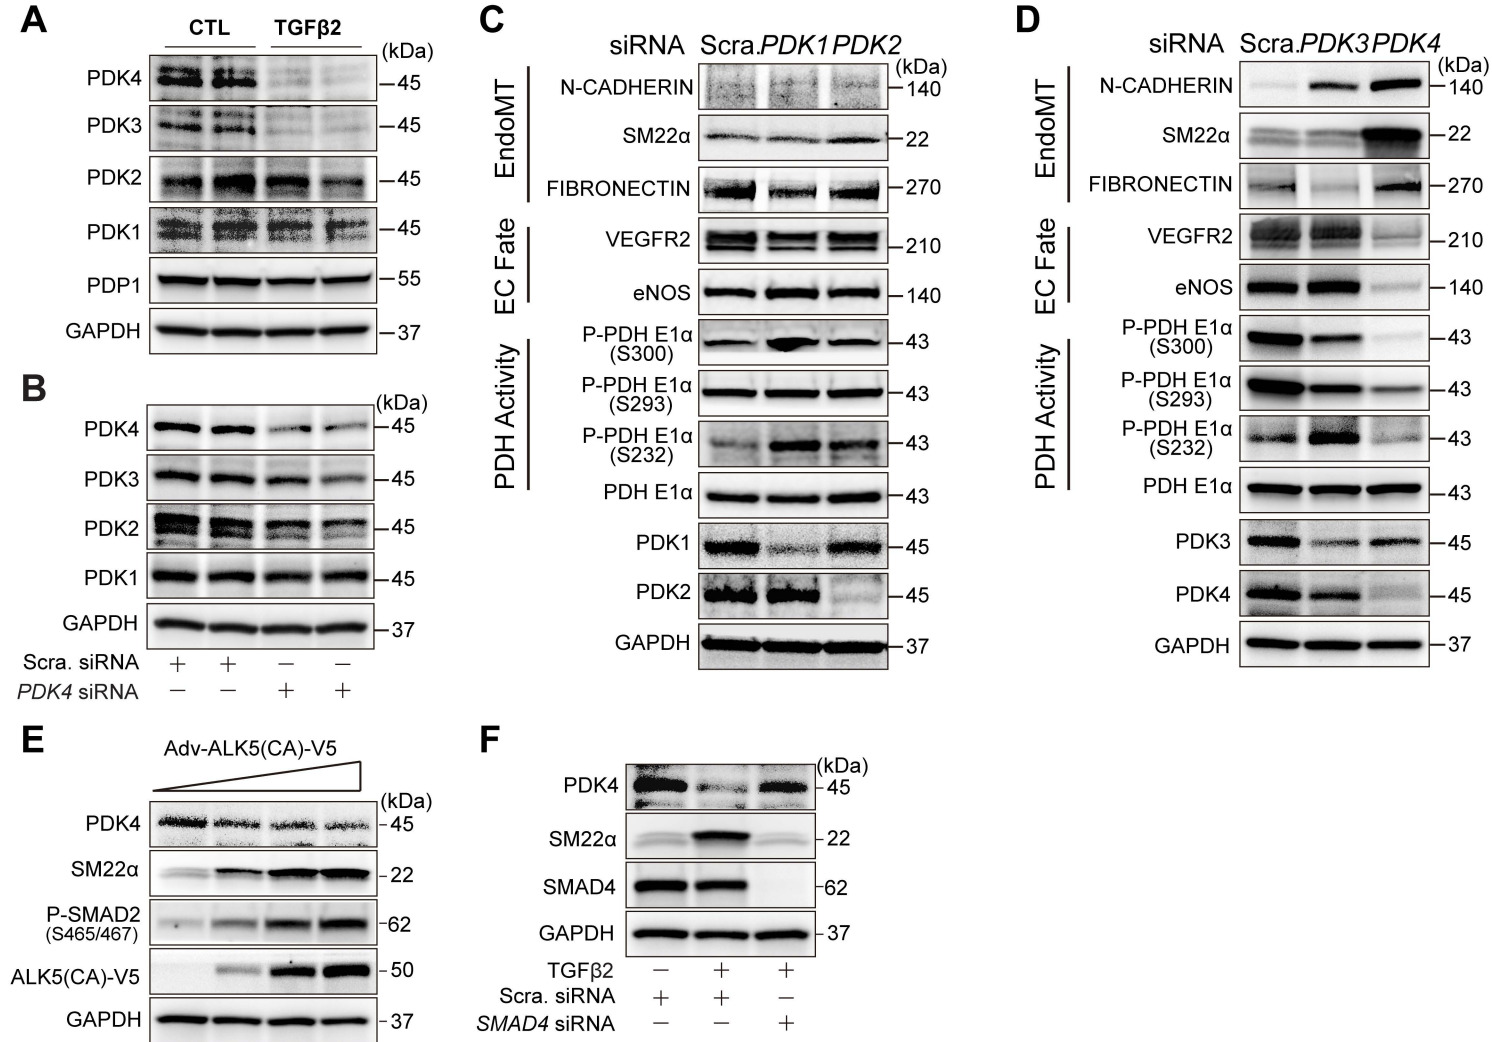

Supplemental Figure 1



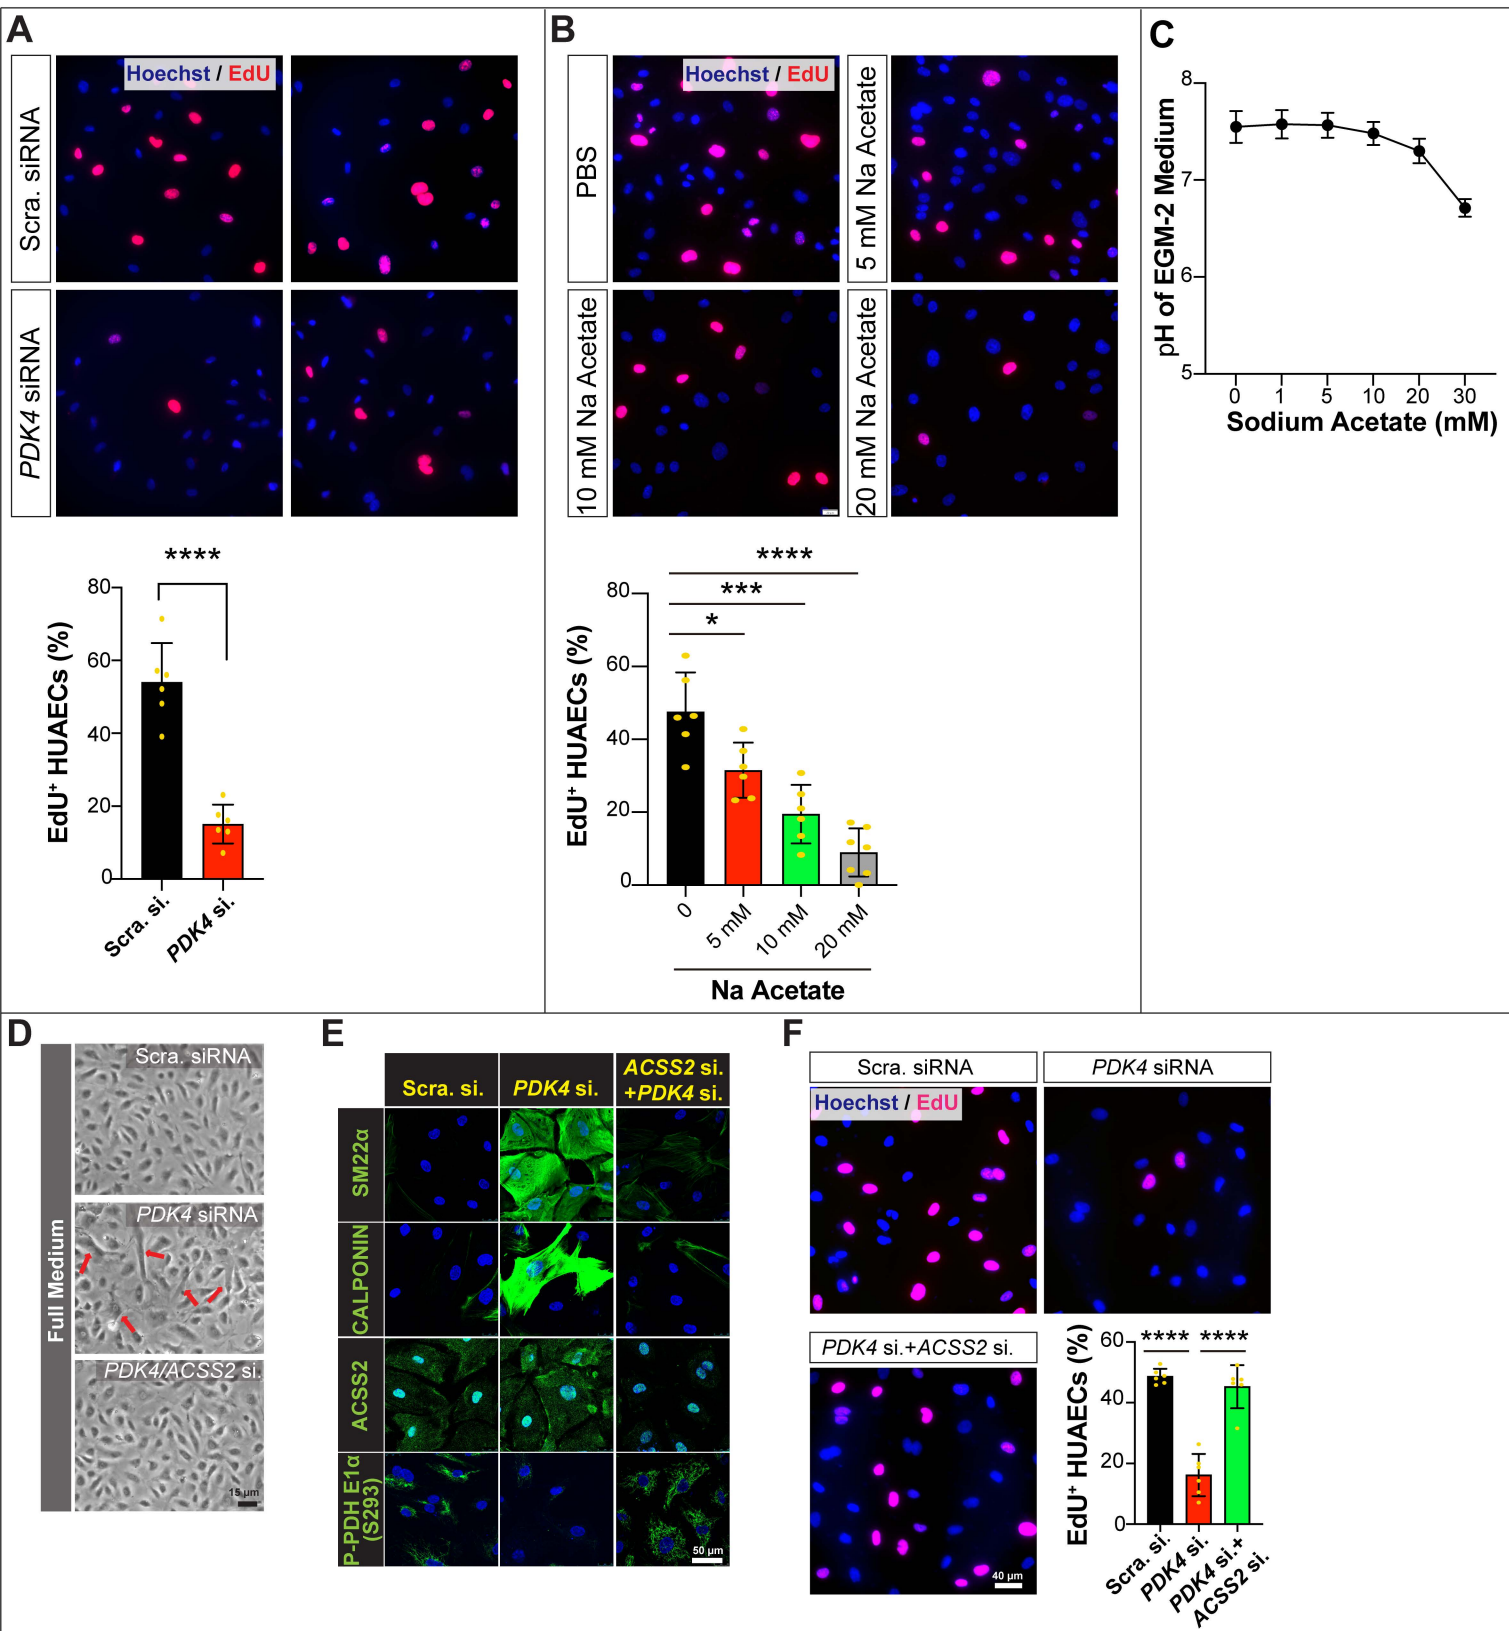

Supplemental Figure 3

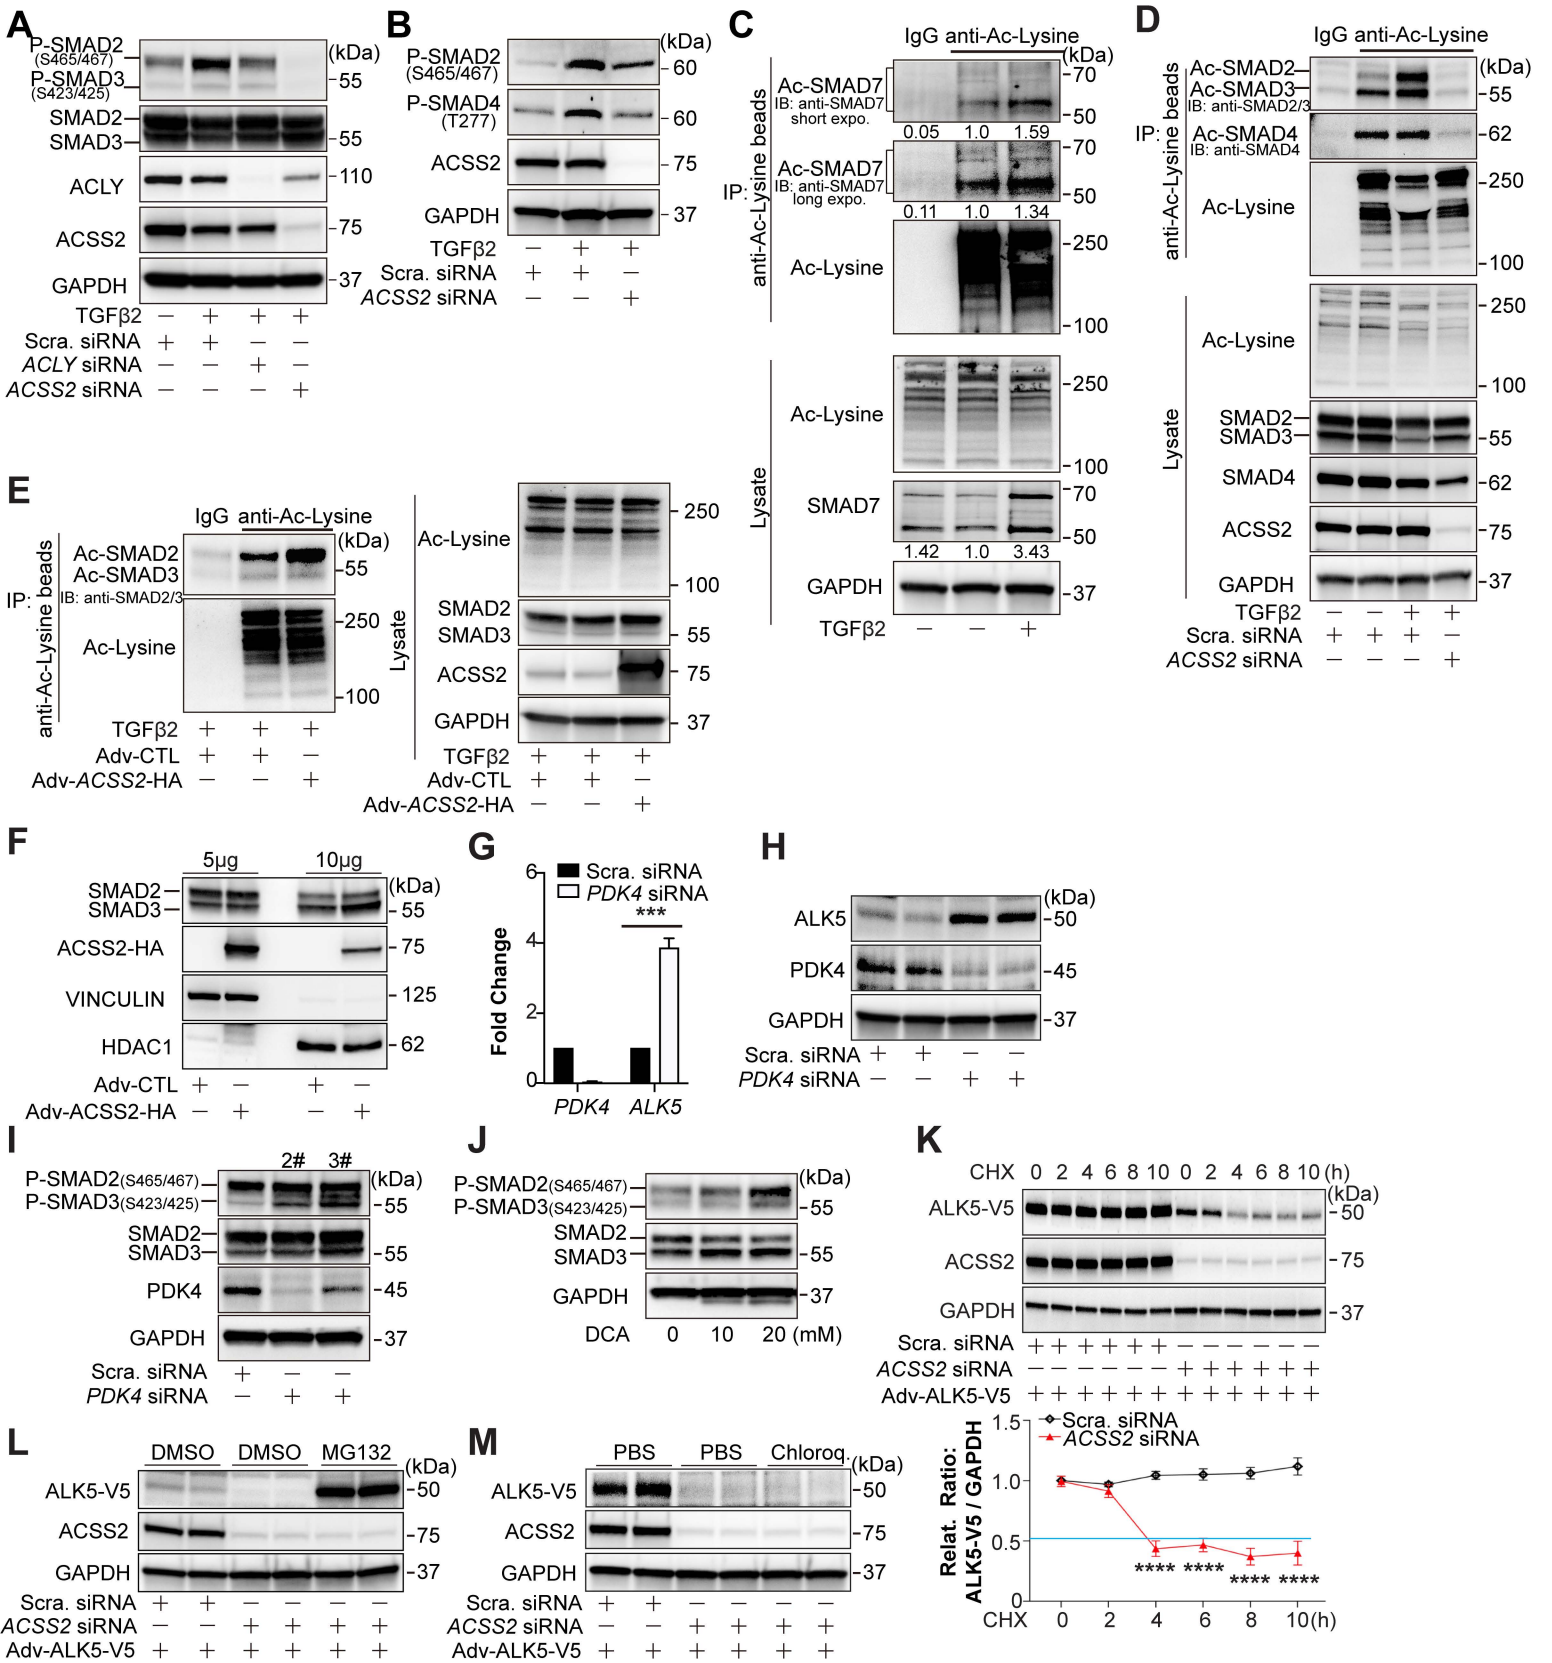

**Supplemental Figure 4**

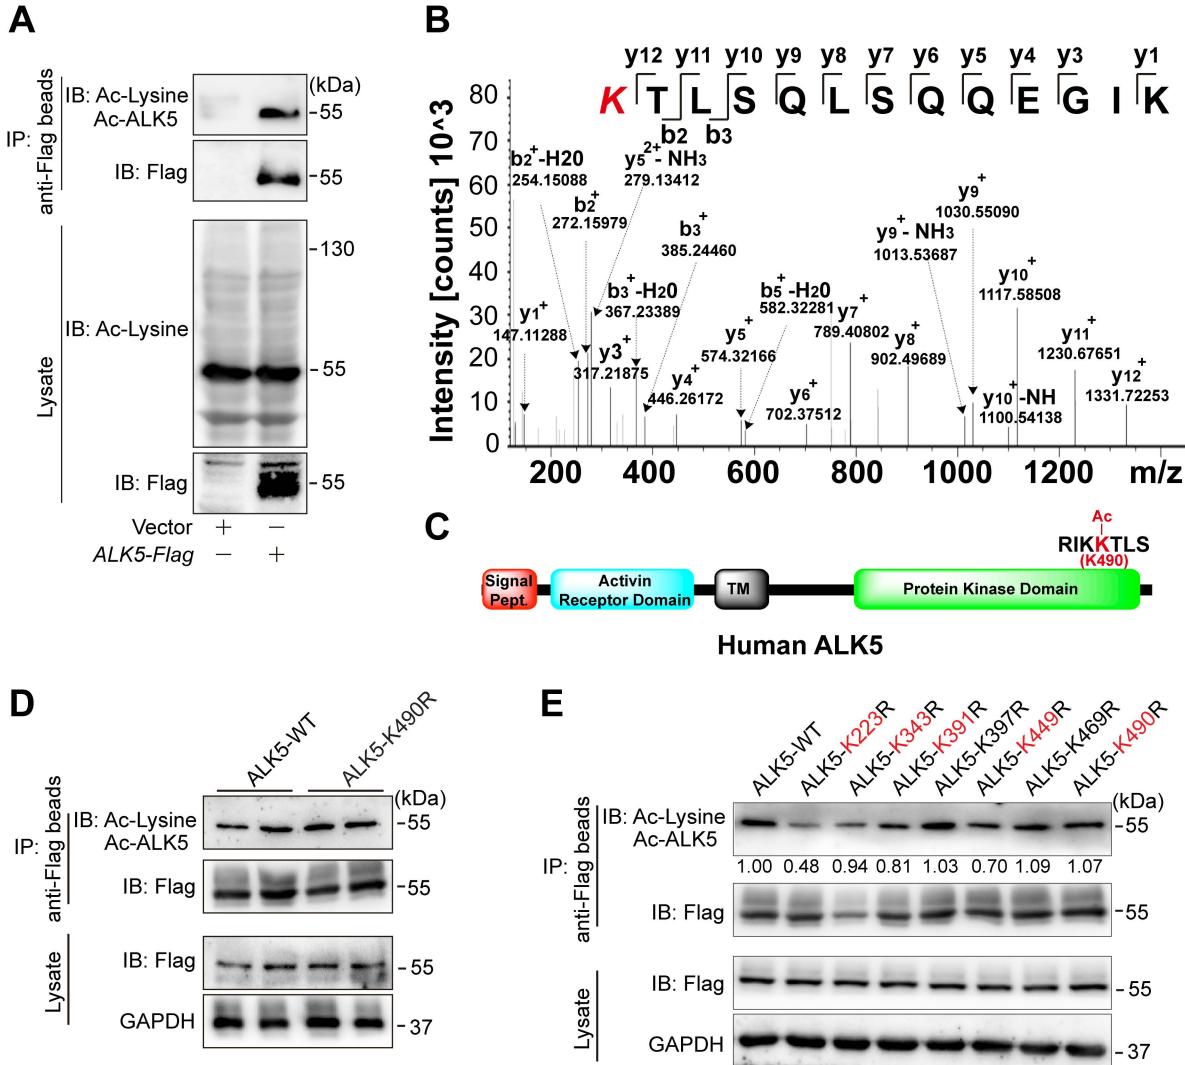

Supplemental Figure 5



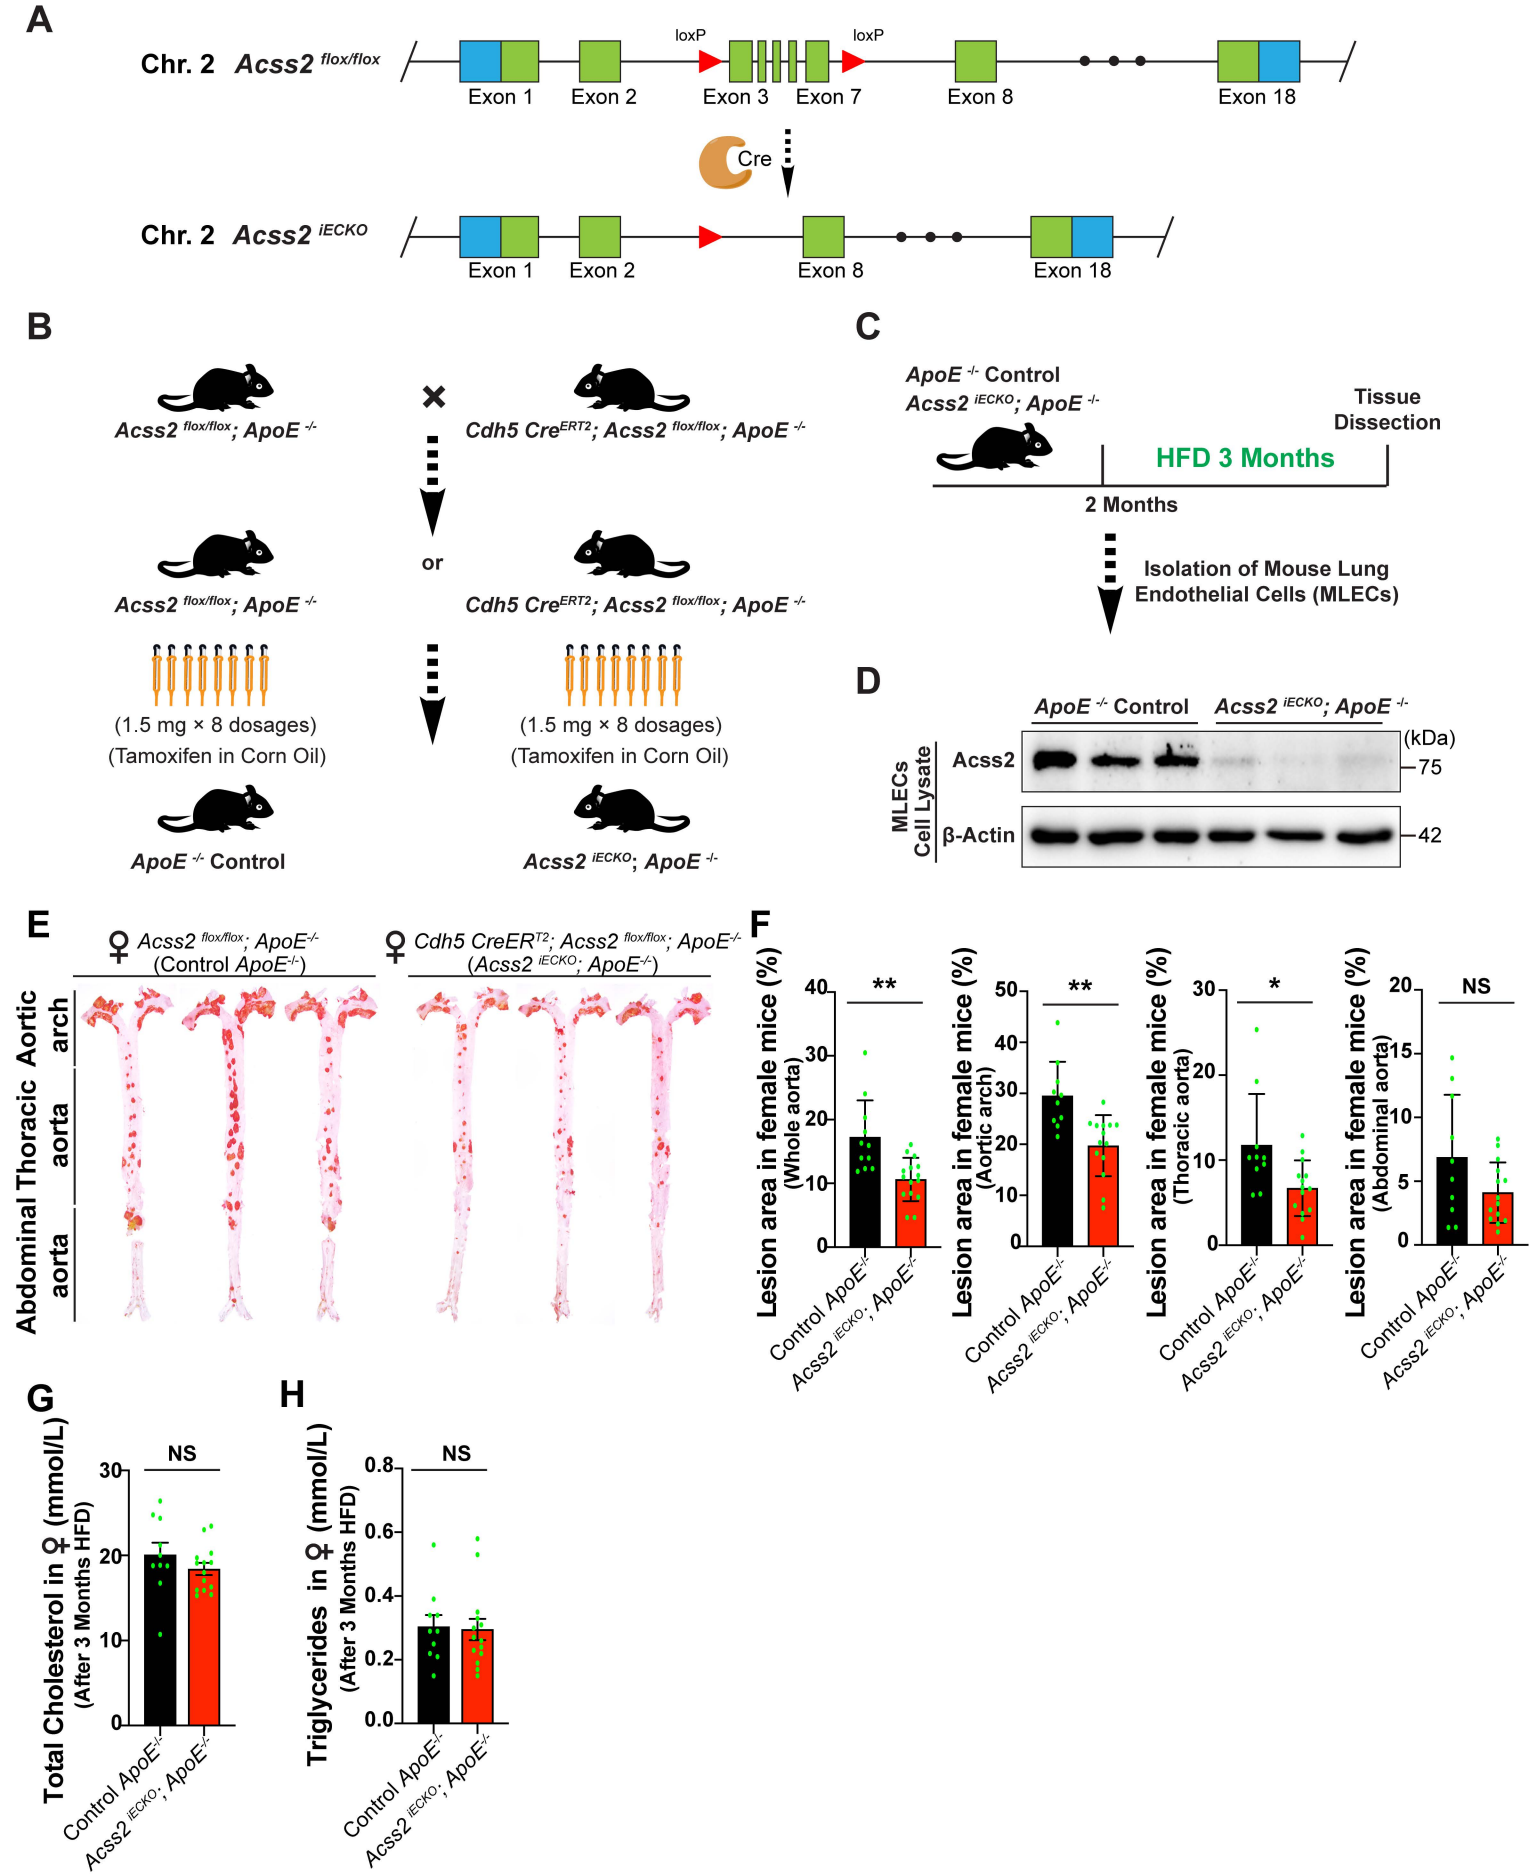

Supplemental Figure 6

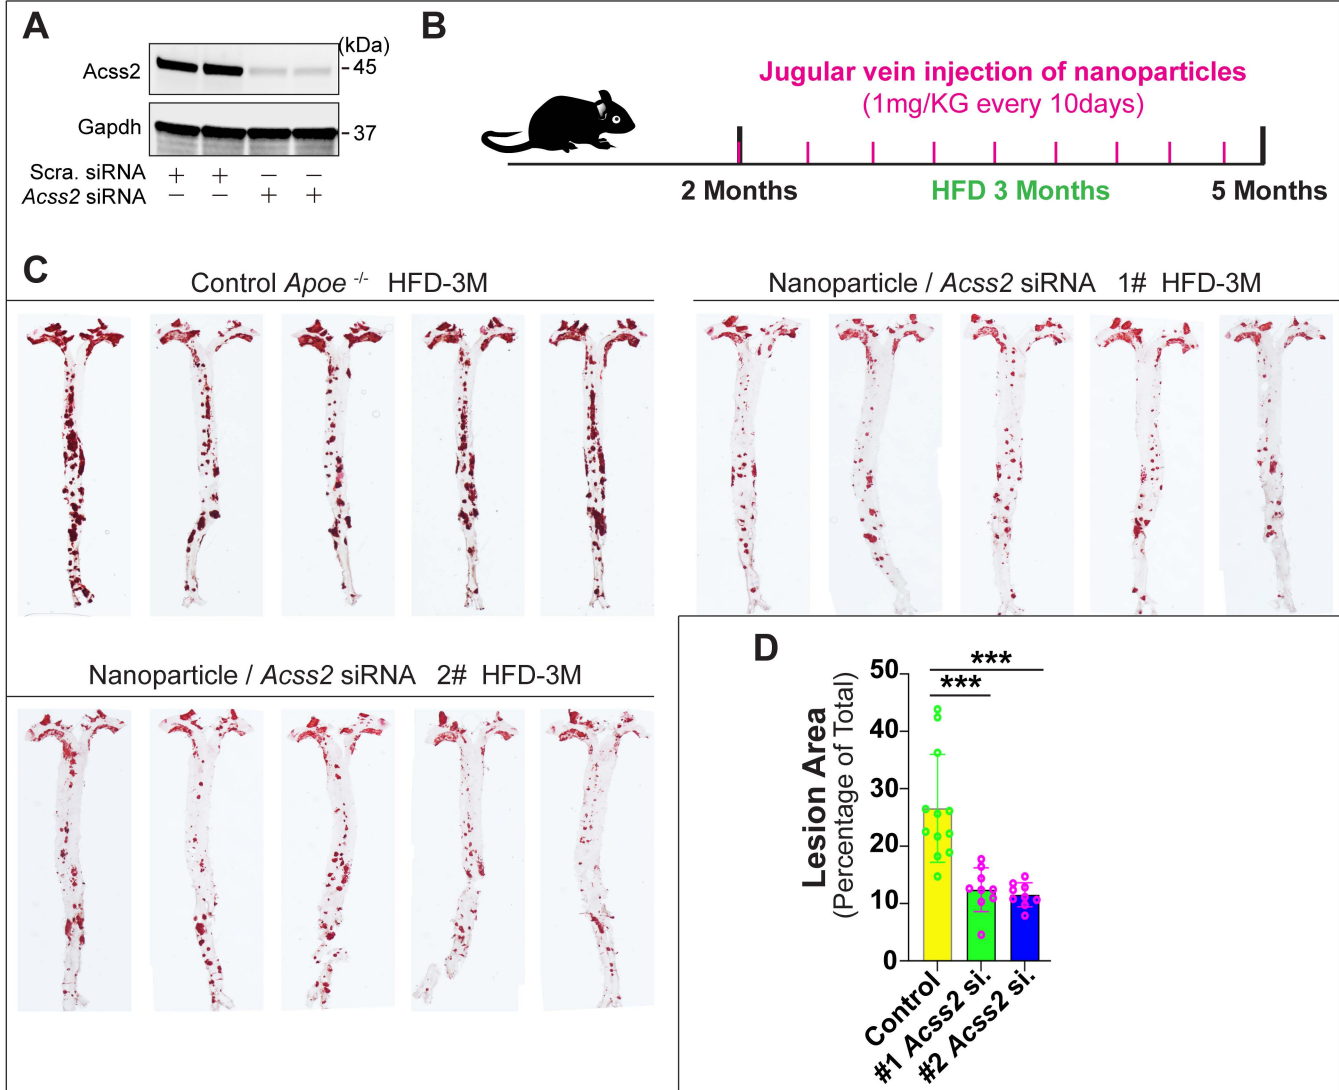

Supplemental Figure 7

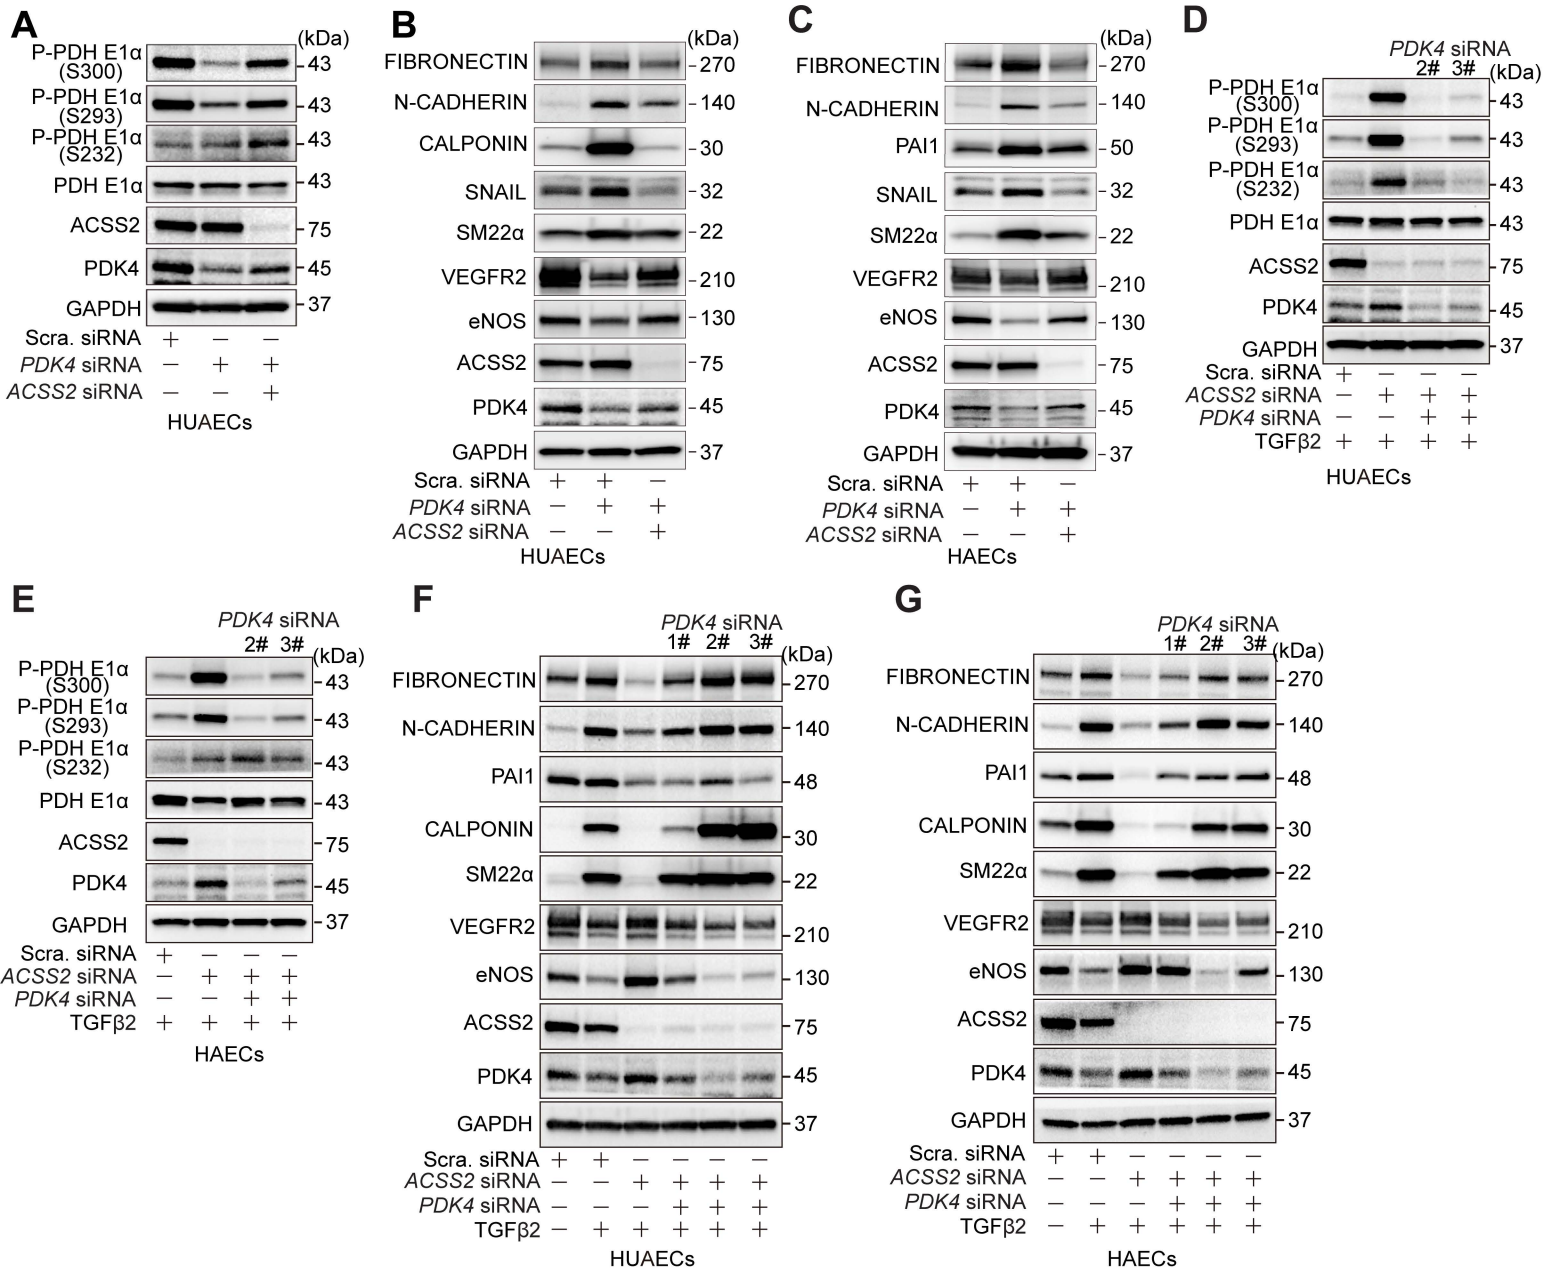

**Supplemental Figure 8**

Supplemental Table 1

| <b>siRNA</b>           | <b>Vendors's Name</b>                 | <b>Catalog Number / siRNA ID</b> |
|------------------------|---------------------------------------|----------------------------------|
| ACSS2 siRNA            | Horizon Discovery Biosciences Limited | E-010396-00-0005                 |
| ACLY siRNA             | Thermo Fisher Scientific              | s915                             |
| PDK4 siRNA 1#          | Thermo Fisher Scientific              | s10261                           |
| PDK4 siRNA 2#          | Thermo Fisher Scientific              | s10262                           |
| PDK4 siRNA 3#          | Thermo Fisher Scientific              | s10263                           |
| PDK1 siRNA             | Thermo Fisher Scientific              | s10252                           |
| PDK2 siRNA             | Thermo Fisher Scientific              | s10255                           |
| PDK3 siRNA             | Thermo Fisher Scientific              | s10258                           |
| SMAD2 siRNA            | Thermo Fisher Scientific              | s8397                            |
| SMAD4 siRNA            | Thermo Fisher Scientific              | s8403                            |
| Negative Control siRNA | Thermo Fisher Scientific              | 4457287                          |

  

| <b>Gene (Human)</b> | <b>Forward primer sequence 5'- 3'</b> | <b>Reverse primer sequence 5'- 3'</b> |
|---------------------|---------------------------------------|---------------------------------------|
| ACLY                | ATCGGTTCAAGTATGCTCGGG                 | GACCAAGTTTTCCACGACGTT                 |
| ACSS2               | AAAGGAGCAACTACCAACATCTG               | GCTGAAGTACACACTTGGAC                  |
| ALDOA               | ATGCCCTACCAATATCCAGCA                 | GCTCCCAGTGGACTCATCTG                  |
| HK2                 | GAGCCACCACTCACCTACT                   | CCAGGCATTGGCAATGTG                    |
| LDHA                | ATGGCAACTCTAAAGGATCAGC                | CCAACCCCAACAAGTGAATCT                 |
| LDHB                | CCTCAGATCGTCAAGTACAGTCC               | ATCACGCGGTGTTGGGTAAT                  |
| PDK1                | CTGTGATACGGATCAGAAACCG                | TCCACCAAACAATAAAGAGTGCT               |
| PDK2                | ATGAAAGAGATCAACCTGCTTCC               | GGCTCTGGACATACCAGCTC                  |
| PDK3                | CGCTCTCCATCAAACAATTCCT                | CCACTGAAGGGCGGTTAAGTA                 |
| PDK4                | GGAGCATTCTCGCGCTACA                   | ACAGGCAATTCTGTGCGAAA                  |
| PFKM                | GGTGCCCGTGTCTTCTTTGT                  | AAGCATCATCGAAACGCTCTC                 |
| PFKFB3              | ATTGCGGTTTTCGATGCCAC                  | GCCACAAGTGTAGGGTCGT                   |
| PKM2                | ATGTCGAAGCCCCATAGTGAA                 | TGGGTGGTGAATCAATGTCCA                 |
| SLC2A1--GLUT1       | ATTGGCTCCGGTATCGTCAAC                 | GCTCAGATAGGACATCCAGGGTA               |
| TGFBR1--ALK5        | ACGGCGTTACAGTGTTTCTG                  | GCACATACAAACGGCCTATCT                 |
| $\beta$ -ACTIN      | ATCAAGATCATTGCTCCTCTGAG               | CTGCTTGCTGATCCACATCTG                 |

  

| <b>Primers for CHIP-qPCR</b> | <b>Forward primer sequence 5'- 3'</b> | <b>Reverse primer sequence 5'- 3'</b> |
|------------------------------|---------------------------------------|---------------------------------------|
| Human PDK4 SBE-1#            | AGGGTAATGTGTCTCAACCACTGTC             | TTCCTTGATTACTTCTCCTCACTTC             |
| Human PDK4 SBE-2#/3#         | AGAATAGTACCATGAAAGACCAAGG             | CCTGTACGAAATGTCCTTACTCCAA             |
| Human PDK4 SBE-4#            | GAGTGCGGGGAGACAAATAAAAC               | GGCTGGGGTTTGAGGGTGC                   |

Supplemental Table 2

| Paraffin Block Label | Race/Ethnicity   | Sex (M/F) | Diameter (cm) | Age (yr) | BAV | Avg Intima Thickness (mm) | G               | Moeckel INTIMAL THICKENING | Chin            | Nana            |
|----------------------|------------------|-----------|---------------|----------|-----|---------------------------|-----------------|----------------------------|-----------------|-----------------|
|                      |                  |           |               |          |     |                           |                 |                            | INTIMAL L THICK | INTIMAL L THICK |
| Healthy Case-1       | Caucasian        | M         | 5.0           | 70       | yes | 0.030                     | minimal/Healthy | absent                     | absent          |                 |
| Healthy Case-2       | African-American | M         | 2.8           | 39       | no  | 0.028                     | minimal/Healthy | absent                     | absent          |                 |
| Healthy Case-3       | Hispanic         | F         | 2.5           | 30       | no  | 0.059                     | minimal/Healthy | absent                     | absent          |                 |
| Healthy Case-4       | Hispanic         | M         | 4.9           | 67       | no  | 0.048                     | minimal/Healthy | absent                     | absent          |                 |
| Healthy Case-5       | Caucasian        | M         | 5.1           | 46       | no  | 0.064                     | minimal/Healthy | absent                     | absent          |                 |
| Healthy Case-6       | African-American | F         | 3.4           | 66       | no  | 0.030                     | minimal/Healthy | absent                     | absent          |                 |
| Healthy Case-7       | Caucasian        | M         | 5.9           | 65       | yes | 0.037                     | minimal/Healthy | absent                     | absent          |                 |
| Neointima Case-1     | Caucasian        | M         | 3.6           | 54       | no  | 0.129                     | moderate        | present                    | present         |                 |
| Neointima Case-2     | Caucasian        | M         | 5.2           | 69       | yes | 0.395                     | moderate        | present                    | present         |                 |
| Neointima Case-3     | Caucasian        | M         | 4.5           | 65       | no  | 0.912                     | mild            | present                    | present         |                 |
| Neointima Case-4     | African-American | M         | 3.4           | 55       | no  | 1.475                     | severe          | present                    | present         |                 |
| Neointima Case-5     | Caucasian        | M         | 5.2           | 65       | no  | 0.119                     | moderate        | present                    | present         |                 |
| Neointima Case-6     | Caucasian        |           | 6.2           | 74       | no  | 0.320                     | severe          | present                    | present         |                 |
